# Supplementary material
Source: PubMed Central journal article supplement (PMC540059)
Supplement: nar_33_suppl-1_D183__1.pdf [file nar_33_suppl-1_D183__1.pdf]

## Description of the PDBSite fields.

| Field name                   | Description.                                                                                                                                                                                                      |
|------------------------------|-------------------------------------------------------------------------------------------------------------------------------------------------------------------------------------------------------------------|
| ID <sup>#</sup>              | Entry identifier.                                                                                                                                                                                                 |
| PDBID <sup>#</sup>           | PDB ID code.                                                                                                                                                                                                      |
| SITE_TYPE <sup>#</sup>       | Functional site type.                                                                                                                                                                                             |
| HEADER <sup>#</sup>          | PDB classification for the entry. The field content corresponds to that in PDB.                                                                                                                                   |
| TITLE <sup>#</sup>           | The title for the experiment or analysis described in the entry. The field content corresponds to the one in PDB.                                                                                                 |
| KEYWORD <sup>#</sup>         | Keywords describing the macromolecule. The content corresponds to the one of KEYWDS of PDB.                                                                                                                       |
| MOLECULE <sup>#</sup>        | Contains names of macromolecules from the COMPND of PDB, designed to search for entries by the names of macromolecules.                                                                                           |
| MOL_CHAINS                   | Identifier list of molecule chains from which the site was extracted.                                                                                                                                             |
| NUM_SITE_CHAINS <sup>#</sup> | Number of different chains to which the residues of the site belong.                                                                                                                                              |
| SITE_DESCR <sup>#</sup>      | Description of the site. The content corresponds to the one of the SITE_DESCRIPTION sub-field of REMARK 800 field of PDB.                                                                                         |
| RESIDUE_NOTAA <sup>#</sup>   | Contains the names of residues that are not amino acids but contained by the site.                                                                                                                                |
| NUMBER_OF_AA <sup>#</sup>    | Residue number in the site and its environment.                                                                                                                                                                   |
| EXPOSURE <sup>#</sup>        | Average solvent accessibility of the site and its environment [DSSP (Kabsch & Sander, 1983)].                                                                                                                     |
| DISCONTINUITY <sup>#</sup>   | Site discontinuity in the primary structure.                                                                                                                                                                      |
| SITE_CHAINS                  | Contains the chain identifiers for each site residue.                                                                                                                                                             |
| POS                          | Contains the numbering of site residues and their environment. The numbering is the same as in the PDB database.                                                                                                  |
| RESNAME                      | Contains residue names of the site and its environment in single-letter amino acid code.                                                                                                                          |
| 2DSTRUCTURE_COMPOSITION      | Describes the distribution of the secondary structure types in site and its environment. Contains the proportions for the site residue assigned to the coil, helix, sheet, bridge [DSSP (Kabsch & Sander, 1983)]. |
| 2DSTRUCTURE                  | Contains secondary structure type for each site residue and its environment [DSSP (Kabsch & Sander, 1983)].                                                                                                       |
| ACCESSIBILITY                | Contains the solvent accessibility value for each site residue and its environment [DSSP (Kabsch & Sander, 1983)].                                                                                                |
| CONTACT_NUMBER               | Contains residue contact number in a protein for site residues. The contact number was calculated using the distances between the residue C $\alpha$ atoms. The threshold for the distance was 10 Å.              |
| POLAR_FRACTION               | The accessible polar fraction score (Bowie                                                                                                                                                                        |

|                |                                                                                                                                                                                                                                                                                                                                                                                                                                                       |
|----------------|-------------------------------------------------------------------------------------------------------------------------------------------------------------------------------------------------------------------------------------------------------------------------------------------------------------------------------------------------------------------------------------------------------------------------------------------------------|
| ENVIR_CHAINS   | et al, 1991).<br>Contains chain identifiers for each residue in the site environment.                                                                                                                                                                                                                                                                                                                                                                 |
| AVERAGE        | Contains the mean values for the physicochemical characteristics of the site and its environment. The physicochemical characteristics are ordered as follows: hydrophathy (Kyte & Doolittle, 1982), hydrophilicity (Hopp & Woods, 1983), hydrophobicity (Eisenberg, 1984), charge (Bogardt et al, 1980), isoelectric point (Bogardt et al, 1980), polarity (Bogardt et al, 1980), volume (Bogardt et al, 1980), hydrophobicity (Bogardt et al, 1980). |
| SPATIAL_MOMENT | Contains the spatial moment values for the physicochemical characteristics of the site and its environment. The same physicochemical characteristics as in the AVERAGE field.                                                                                                                                                                                                                                                                         |
| ATOM           | Contains atomic coordinates of site residues. The values are extracted from the PDB database without changes.                                                                                                                                                                                                                                                                                                                                         |
| END            | End of the entry.                                                                                                                                                                                                                                                                                                                                                                                                                                     |

Remark: # the field can be used for search queries in SRS

## References

- Bogardt,R.A., Jones B.N., Dwulet F.E., Garner W.H., Lehman L.D. and Gurd F.R. (1980) Evolution of the amino acid substitution in the mammalian myoglobin gene. *J Mol Evol*, **15**, 197–218.
- Bowie,J.U., Luthy,R. and Eisenberg,D. (1991) A method to identify protein sequences that fold into a known three-dimensional structure. *Science*, **253**, 164-170.
- Eisenberg,D., Schwarz,E., Komaromy,M. and Wall,R. (1984) Analysis of membrane and surface protein sequences with the hydrophobic moment plot. *J Mol Biol*, **179**,125-42.
- Hopp,T.P. and Woods,K.R. (1983) A computer program for predicting protein antigenic determinants. *Mol. Immunol.* **20**, 483–489.
- Kabsch,W. and Sander,C. (1983) Dictionary of protein secondary structure: Pattern recognition of hydrogen-bonded and geometrical features. *Biopolymers*, **22**, 2577-637.
- Kyte,J. and Doolittle,R.F. (1982) A simple method for displaying the hydrophathic character of a protein. *J Mol Biol*, **157**, 105-132.
